# Supplementary material for: Efficient in vivo editing of OTC-deficient patient-derived primary human hepatocytes
Source: PubMed Central journal article supplement — JHEP Rep. 2019 Dec 27;2(1):100065. doi: 10.1016/j.jhepr.2019.100065 (PMC7005564; doi:10.1016/j.jhepr.2019.100065), 2019-12-27
Supplement: mmc2.pdf [file mmc2.pdf]

## Journal of Hepatology CTAT methods

Tables for a “Complete, Transparent, Accurate and Timely account” (CTAT) are now mandatory for all revised submissions. The aim is to enhance the reproducibility of methods.

- Only include the parts relevant to your study
- Refer to the CTAT in the main text as ‘Supplementary CTAT Table’
- Do not add subheadings
- Add as many rows as needed to include all information
- Only include one item per row

**If the CTAT form is not relevant to your study, please outline the reasons why:**

|  |
|--|
|  |
|--|

### 1.1 Antibodies

| Name                     | Citation       | Supplier                            | Cat no.     | Clone no.  |
|--------------------------|----------------|-------------------------------------|-------------|------------|
| Rabbit anti hGAPDH-AF647 | N/A            | Abcam                               | ab215227    | EPR6256    |
| Rabbit anti hOTC         | PMID: 27657746 | Sigma-Aldrich                       | HPA000243   | Polyclonal |
| Donkey anti rabbit-AF594 | PMID: 28321397 | Invitrogen                          | A21207      | Polyclonal |
| Rabbit anti hOTC         | PMID: 30108309 | Abcam                               | ab91418     | Polyclonal |
| Mouse anti vinculin      | PMID:19279185  | Sigma-Aldrich                       | V9131       | hVIN-1     |
| Goat anti rabbit-HRP     | PMID: 31575858 | Santa Cruz Biotechnology            | Sc-2004     | Polyclonal |
| Goat anti mouse-HRP      | PMID: 31530811 | Dako                                | P0447       | Polyclonal |
| Rabbit anti Ki-67        | PMID: 30622257 | Abcam                               | ab16667     | SP6        |
| Rabbit anti-BrdU         | PMID: 30551353 | Abcam                               | ab1893      | Polyclonal |
| Rabbit anti-GAPDH        | PMID: 30710055 | Abcam                               | ab128915    | EPR6256    |
| Donkey anti-sheep IgG    | PMID: 29670169 | Jackson ImmunoResearch Laboratories | 713-065-147 | Polyclonal |
| Donkey anti-rabbit IgG   | PMID: 31558756 | Jackson ImmunoResearch Laboratories | 711-065-152 | Polyclonal |

### 1.2 Cell lines

| Name    | Citation                                                         | Supplier                                       | Cat no. | Passage no. | Authentication test method                             |
|---------|------------------------------------------------------------------|------------------------------------------------|---------|-------------|--------------------------------------------------------|
| HEK-293 | Graham <i>et al.</i> (1977) Characteristics of a human cell line | Professor Dusty Miller (Fred Hutchinson Cancer | N/A     | <P40        | None; the HEK-293 cell line was tested and found to be |

# JOURNAL OF HEPATOLOGY

|  |                                                                           |                 |  |  |                    |
|--|---------------------------------------------------------------------------|-----------------|--|--|--------------------|
|  | transformed by DNA from human adenovirus type 5. J Gen Virol 36(1): 59-74 | Research Center |  |  | free of mycoplasma |
|--|---------------------------------------------------------------------------|-----------------|--|--|--------------------|

## 1.3 Organisms

| Name                | Citation                                                  | Supplier                                                                         | Strain                                                               | Sex    | Age                                   | Overall n number                                                     |
|---------------------|-----------------------------------------------------------|----------------------------------------------------------------------------------|----------------------------------------------------------------------|--------|---------------------------------------|----------------------------------------------------------------------|
| <i>Mus musculus</i> | Li <i>et al.</i> (1999) Biochim Biophys Acta 1455(1):1-11 | The Jackson Laboratory (Bar Harbor, ME)                                          | Sp <sup>fash</sup>                                                   | Male   | 3-4 old newborn pups                  | n=5 per treatment group (unless an animal was culled for ill health) |
| <i>Mus musculus</i> | Azuma <i>et al.</i> (2007) <i>Nat Biotech</i> 25: 903-910 | Professor Markus Grompe (Oregon Health and Science University, Portland, Oregon) | FRG (Fah <sup>-/-</sup> /Rag2 <sup>-/-</sup> /Il2rg <sup>-/-</sup> ) | Female | Adult, engrafted at 8-12 weeks of age | n=5 per treatment group (unless patient hepatocytes were limiting)   |

## 1.4 Sequence based reagents

| Name               | Sequence                            | Supplier  |
|--------------------|-------------------------------------|-----------|
| Human OTC minigene | NCBI Reference Sequence NG_008471.1 | GenScript |

## 1.5 Biological samples

| Description               | Source          | Identifier                                  |
|---------------------------|-----------------|---------------------------------------------|
| Primary human hepatocytes | Explanted liver | Deidentified, mutation in exon 9 (c.905A>T) |

## 1.6 Deposited data

| Name of repository                                                               | Identifier                   | Link                                                                                                                |
|----------------------------------------------------------------------------------|------------------------------|---------------------------------------------------------------------------------------------------------------------|
| National Center for Biotechnology Information (NCBI) Sequence Read Archive (SRA) | Accession number PRJNA543707 | <a href="https://www.ncbi.nlm.nih.gov/sra/?term=PRJNA543707">https://www.ncbi.nlm.nih.gov/sra/?term=PRJNA543707</a> |

## 1.7 Software

| Software name  | Manufacturer                                                                                                          | Version |
|----------------|-----------------------------------------------------------------------------------------------------------------------|---------|
| CRISPResso     | <a href="http://crispresso.pinelloolab.partners.org">http://crispresso.pinelloolab.partners.org</a>                   | 1.0.8   |
| Blastn         | <a href="https://blast.ncbi.nlm.nih.gov/Blast.cgi">https://blast.ncbi.nlm.nih.gov/Blast.cgi</a>                       | 2.6.0+  |
| GraphPad Prism | <a href="https://www.graphpad.com/scientific-software/prism/">https://www.graphpad.com/scientific-software/prism/</a> | 7.02    |
| ZEN 2          | Zeiss                                                                                                                 | 2.0.0.0 |

## 1.8 Other (e.g. drugs, proteins, vectors etc.)

| Reagent                                                                         | Supplier      | Catalogue number |
|---------------------------------------------------------------------------------|---------------|------------------|
| pX602 (plasmid)                                                                 | AddGene       | Plasmid #61593   |
| 2-(2-nitro-4-fluoromethylbenzoyl)-1,3-cyclohexanedione (NTBC; CuRx™ Nitisinone) | Yecuris       | 20-0028          |
| Bromodeoxyuridine (BrdU)                                                        | Sigma-Aldrich | B5002            |

## 1.9 Please provide the details of the corresponding methods author for the manuscript:

Professor Ian Alexander  
Gene Therapy Research Unit  
The Children's Hospital at Westmead, NSW, Australia  
[ian.alexander@health.nsw.gov.au](mailto:ian.alexander@health.nsw.gov.au)

## 2.0 Please confirm for randomised controlled trials all versions of the clinical protocol are included in the submission. These will be published online as supplementary information.

No randomised controlled trials are included in this manuscript
